# Supplementary material for: Infection prediction in swine populations with machine learning
Source: PubMed Central journal article supplement (PMC10584972; doi:10.1038/s41598-023-43472-5), 2023-10-18
Supplement: 41598_2023_43472_MOESM5_ESM.pdf [file 41598_2023_43472_MOESM5_ESM.pdf]

# 1 Infection Prediction in Swine Populations with Machine Learning

## 2 Supplementary Materials

3 Avishai Halev, Beatriz Martínez-López, Maria Clavijo, Carlos Gonzalez-Crespo, Jeonghoon Kim, Chao Huang, Seth  
4 Krantz, Rebecca Robbins, and Xin Liu

## 5 1 Supplementary Results

6 Tables [S1](#), [S2](#) and [S3](#) give the performance of additional machine learning models on both farm systems in comparison  
7 to the random forest, gradient boosting, and neural network (system B) models reported in the paper.

## 8 2 Supplementary Discussion

### 9 2.1 Dimension Reduction Analysis

10 Table [S4](#) and Figure [S1](#) are the results of our analysis of the model's dependence on the dimension reduction  
11 hyperparameter, the number of features selected for dimension reduction, in system A.

### 12 2.2 Distribution Shift

13 Tables [S5](#) and [S6](#) and detail distribution differences between the train and test sets. Table [S7](#) details missing  
14 movement data in the training set in system B.

### 15 2.3 Test Rates and Heuristic Model

16 The structure of the available data leads to test rates being an overly effective predictor in the dataset in system A  
17 that would not generalize to other production systems or sample sets. This is a result of the fact that many farms  
18 have an overwhelming number of samples of one class and few or none of the other class.

19 To illustrate this, we build a baseline heuristic model based on the historical test rates. Specifically, consider a  
20 sample taken at farm  $i$  on day  $T$  that has historical positivity and negativity rates  $P_T^{(i)}$  and  $N_T^{(i)}$ , respectively. Then we  
21 define the probability of infection at farm  $i$  on day  $T$  as

$$p(i, T) = \frac{P_T^{(i)}}{P_T^{(i)} + N_T^{(i)}}. \quad (1)$$

22 On system A, this simple model is effective: with a 60-day window, it obtains a balanced accuracy of 0.883  
23 on the test set, surpassing all of the machine learning models. This observation is an artifact of the data: many  
24 samples exist on farms that either have no or few tests of one class; with a 60-day window, a particularly extreme  
25 case consists of a farm with 577 negative samples – containing over half of the dataset – and no positive samples.  
26 The full distribution of samples by farm, the majority of samples occur at farms that only have negative samples, is  
27 available in Supplementary Figure S4. Ultimately, to maintain the robustness of the model, we remove historical  
28 rates from the feature set in system A.

29 The distributions in system B do not suffer to the same extent, with the heuristic model able to perform well in  
30 some cases but not all. The model achieves scores of 0.584, 0.578, 0.725, 0.752 on PRRS, PEDV, IAV and MHP,  
31 respectively. As a result, we retain test rates as a feature in this system.

## 32 3 Supplementary Methods

### 33 3.1 Data

34 This section contains additional details on the predictor categories.

### 35 **Direct Contact Predictors**

36 Direct contact predictors derive from the fact that the transportation of infected pigs is a major factor leading to  
37 infection and outbreak. These predictors are motivated by the idea that the movement of pigs between farms may  
38 beget disease at the farm receiving pigs; intuitively, infections are more likely to occur if diagnoses at the farm  
39 sending pigs imply previous disease infection or outbreak. We model this disease pathway with three main types of  
40 features: movement quantity features, source distance features and source diagnosis features, broken down below.

41 1. **Movement quantity features** enumerate the number of pigs sent to farm  $i$  within the window  $W_{T,n}$  from each  
42 of its respective sourcing farms. The number of features is determined by the farm that has the highest number  
43 of unique source farms in its busiest window.

44 2. **Source distance** and **source diagnosis** features are compiled using the source farms from above. Source  
45 distance features are the distances of each of the respective source farms to the farm receiving pigs. Source  
46 diagnosis features, on the other hand, are the counts of positive and negative diagnoses at each source farm  
47 within  $W_{T,n}$ . For every source movement feature, there is one corresponding source distance feature and two  
48 source diagnosis features – one positive, one negative.

### 49 **Spatio-temporal predictors**

50 Spatio-temporal predictors attempt to model local area spread of disease between swine populations. We expect local  
51 area spread to occur more often between nearby farms; as a result, we add the distances of the five nearest farms  
52 to the farm in a given sample as features. In addition, climactic factors are known to affect disease transmission;  
53 consistent warm or cold temperatures, for example, often lead to faster spread of disease and outbreak intensity. To  
54 model this, we encode five meteorological features: maximum and minimum temperature, humidity, wind direction,  
55 and wind speed. Each feature is extracted daily over  $W_{T,n}$  at which point their respective means are computed to give  
56 the final value.

### 57 **Historical predictors**

58 Our final set of predictors are historical predictors, which attempt to capture past farm performance that may correlate  
59 with infection and outbreak. Our main source of historical features are production data, which include a variety of  
60 recorded data: ranging from the number of litters per female to the total pigs born dead, and including statistics on  
61 feed consumption, pig weights, spending on veterinary services, among others.

62 In system B, we focus on three subsets of the production features: mortality-related, feed related, and cull related.  
63 We find that by training models solely with these features, combined with the other predictors, provides improved  
64 performance compared to using all production features.

### 65 **Test Rates**

66 Our final type of historical feature is historical test rates. Specifically, we define two features – the historical  
67 positivity rate and the historical negativity rate – as follows.

68 Let  $P_{[0,T]}^{(i)}$  and  $N_{[0,T]}^{(i)}$  be the number of positive and negative tests, respectively, at farm  $i$  across all days from the  
69 beginning of available data through day  $T - 1$ . Then the historical positivity and negativity rates at farm  $i$  on day  $T$   
70 are

$$P_{[0,T]}^{(i)}/T \text{ and } N_{[0,T]}^{(i)}/T, \quad (2)$$

71 respectively. We examine models with test rates for both the sample farm – at which the sample is defined – and  
72 its source farms. Due to the structure of the dataset, however, we remove test rates at the sample farm as features  
73 system A, while retaining them in system B. In both systems, we use the test rates at source farms as features.

### 74 **Farm-specific predictors**

75 Finally, we consider additional farm-specific predictors in system B. Specifically, we analyze biosecurity data, a  
76 type of data unavailable in system A. This data concerns the management policies of each farm. We focus on five

77 main policy features: the estimated number of swine on site, the carcass disposal plan, the manure storage method,  
78 the employee access point plan, and whether there is a shared lagoon. The estimated number of swine feature  
79 is continuous while the others are categorical; the categorical information is one-hot encoded to form numerical  
80 features which are concatenated with the rest of the feature set.

### 81 **Biosecurity Features**

82 The following is a list of the categories involved in the biosecurity features for system B. These features (with  
83 the exception of the estimation number of swine on site) are one-hot encoded and then appended with the numerical  
84 features. The estimated number of swine on site are appended as is.

#### 85 1. Estimated Number of Animals (Swine) on Site

- 86 • Quantitative, data redacted for privacy

#### 87 2. Current Carcass Disposal Plan

- 88 • Rendering
- 89 • Burial On-Site
- 90 • Incinerator
- 91 • Compost
- 92 • Biovator
- 93 • Not Applicable/Data Missing

#### 94 3. Manure Storage (method)

- 95 • Lagoon
- 96 • Tank
- 97 • Deep Pit
- 98 • Not Applicable/Data Missing

#### 99 4. LOS Access Point Employees

- 100 • Shower In/Out
- 101 • Boot Change
- 102 • Not Applicable/Data Missing

#### 103 5. Shared Lagoon

- 104 • Yes
- 105 • No
- 106 • Tank
- 107 • Not Applicable/Data Missing

## 108 **Resultant Sample Set**

109 Tables S8 and S9 contain details of the sample sets used in the machine learning process.

## 110 **3.2 Feature Names**

111 This section describes the naming conventions behind the figures used in the text in Figures 1 and 2, and in  
112 Supplementary Table S9. All numbered features are zero-indexed.

- 113 • *Farm Density Indicator/Nearest Farm Distance ( $n$ th)*. These features are the distances in kilometers of the  
114 five nearest farms. They serve as a proxy for the local farm density: if the five closest farms are nearby and  
115 the distances are low, the local farm density is high, and vice versa.
- 116 • *Sow Production: <Feature Name>*. These are sow production features. Details on specific features, as well  
117 as a list of all features, are available in Supplementary Table S8.
- 118 • *Close Out: <Feature Name>*. These are key performance indicators on finishing farms in system A.
- 119 • *Nurfin: <Feature Name>*. These are production features on nursing/finishing farms in system B. Details on  
120 specific features, as well as a list of all features, are available in Supplementary Table S8.
- 121 • *Source Movement:  $n$ th*. This is the number of incoming swine from the  $n$ th source farm. Farm 0 indicates the  
122 farm sending the most pigs in the historical window and farm  $n$  denotes the farm sending the least pigs. The  
123 numbers  $0, 1, \dots, n$  corresponding to *Source Negativity Rate*, *Source Positivity Rate*, *Source Negative Tests*,  
124 *Source Positive Tests*, and *Source Distance* features, e.g. *Source Negativity Rate: 4* refers to the same farm  
125 as *Source Movement: 4* within a given sample. Note that farm 4 in one sample does not necessarily refer to  
126 farm 4 from another sample as the corresponding ordering of numbers of incoming pigs changes between  
127 destination farms and historical windows.
- 128 • *Source Positivity/Negativity Rate:  $n$* . This is the historical positivity/negativity rate (days with positive/negative  
129 diagnoses/total days) on the  $n$ th source farm.
- 130 • *Source Positive/Negative Tests:  $n$ th*. This is the count of positive or negative tests within the historical window  
131 on the  $n$ th source farm. This differs from historical test rates in that test rates are normalized by the number of  
132 total historical days and are collected over all previous days, while positive/negative tests are strict counts and  
133 collected only over the historical window.

## 134 **3.3 Model Stages**

135 This section contains additional details on the model stages.

136 The first stage is standardization, where each feature has its respective mean subtracted and is then divided by  
137 its standard deviation in order to make the features scale-invariant. The motivation and process behind the four  
138 subsequent stages is discussed below.

### 139 **Feature Selection**

140 The next step is a feature selection, which attempts to select an optimal subset of features to maximize performance  
141 of the model. Feature selection differs from dimension reduction in that it is a supervised process; features are  
142 selected according to their ability to aid model performance. As this type of supervision can depend significantly on  
143 the performance of the model, we perform this step across multiple models to determine the best combination of  
144 features and model. As a benchmark, we first analyze models with all features before performing a feature selection;  
145 this can be thought of as an identity feature selection. We discuss feature selection methodology and results in depth  
146 in a separate section.

147 **Dimension Reduction**

148 Due to the relatively large number of features – ranging from 204 to 404 depending on the system, disease, and  
149 window – we reduce the dimension of the data to improve the model’s ability to generalize. In system B, we use a  
150 dimension reduction across all features. In system A, we explore both a standard dimension reduction as well as  
151 a stratified dimension reduction, wherein we perform two dimension reductions, one each for the sow and close  
152 out features, and then recombine them with the other features post-reduction. This latter dimension reduction  
153 is motivated by the idea that linear correlations are likely to exist within the sow and close out data; running a  
154 dimension reduction separately on these datasets will best extract those relationships. In both cases, we use principal  
155 component analysis (PCA) to perform the dimension reduction; we choose the number of PCA components via the  
156 cross-validation process, discussed in the cross validation section.

157 **Machine Learning Models**

158 We examine five binary classifiers: logistic regression, support vector machines, decision trees, gradient boosting,  
159 and random forests. In system B, we also explore a multi-layer perceptron model. Specifically, we examine fully  
160 connected models and explore models with both two layers and three layers, the latter in an auto-encoder type  
161 architecture. We find that this architecture is particularly suited for system B, as the samples suffer from significant  
162 distribution drift. As this is less of a factor in system A, we do not report results with this model. The auto-encoder  
163 models are able to extract the most important signals, allowing for better performance on validation and testing sets.  
164 In all cases, we tune hyperparameters with the five-fold cross-validation procedure.

165 **Metrics**

166 Due to the imbalance between classes in this binary classification, we select **balanced accuracy** as the metric to  
167 evaluate model performance. Balanced accuracy can be viewed in two ways – first, it is the weighted accuracy of  
168 each class, so that performance on the smaller class is weighted equally to performance on the larger class:

$$\text{Balanced Accuracy} = \frac{\text{Correct predictions on true negatives}}{\text{Total true negatives}} + \frac{\text{Correct predictions on true positive}}{\text{Total true positives}}$$

169 Second, it is the average of the model’s sensitivity and specificity:

$$\text{Balanced Accuracy} = \frac{1}{2} \left( \frac{TP}{TP + FN} + \frac{TN}{TN + FP} \right)$$

170 where  $TP$ ,  $TN$ ,  $FP$ , and  $FN$  are the true positive, true negative, false positive, and false negative rates, respec-  
171 tively.

While balanced accuracy scores avoid the optimism of receiver-operator characteristic area under curves (ROC-AUC) on imbalanced datasets, they do necessitate the choice of a specific threshold for prediction. As with our other hyperparameters, we determine the optimal threshold in the cross-validation process as the threshold that maximizes the Youden’s J statistic on the validation set:

$$\begin{aligned} J &= \text{sensitivity} + \text{specificity} - 1 \\ &= \frac{TP}{TP + FN} + \frac{TN}{TN + FP} - 1; \end{aligned}$$

172 it is equivalent to the threshold that maximizes the difference between the true and false positive rates. Since  
173 these thresholds are chosen to maximize performance on the validation set under consideration, we evaluate the  
174 performance of the models with these thresholds on the test set.

175 **Cross Validation**

176 All of our hyperparameters are explored by cross-validation. We first perform a train/test split by setting the last  
177 quarter of the samples aside, to ensure that the model avoids time-series data leakage. With the remaining data, we  
178 perform a five-fold cross validation across all of our hyperparameters; in each case, the folds are split before any  
179 scaling/dimension reduction is performed to prevent data leakage. The full set of hyperparameters explored is in  
180 Table [S10](#).

|                     | Parameters | 14 Day      |       |        | 30 Day      |       |        |
|---------------------|------------|-------------|-------|--------|-------------|-------|--------|
|                     |            | CV          | Test  | Thresh | CV          | Test  | Thresh |
|                     | Trees      |             |       |        |             |       |        |
| Random Forest       | 10         | 0.895±0.040 | 0.829 | 0.095  | 0.879±0.033 | 0.833 | 0.160  |
|                     | 25         | 0.892±0.037 | 0.878 | 0.190  | 0.873±0.027 | 0.828 | 0.198  |
|                     | 100        | 0.885±0.047 | 0.842 | 0.204  | 0.880±0.030 | 0.824 | 0.194  |
|                     | Trees      |             |       |        |             |       |        |
| Gradient Boosting   | 10         | 0.890±0.020 | 0.849 | 0.064  | 0.891±0.025 | 0.801 | 0.053  |
|                     | 25         | 0.880±0.021 | 0.844 | 0.109  | 0.891±0.025 | 0.792 | 0.060  |
|                     | 100        | 0.888±0.012 | 0.840 | 0.073  | 0.889±0.028 | 0.801 | 0.064  |
|                     | Neighbors  |             |       |        |             |       |        |
| KNN                 | 5          | 0.805±0.047 | 0.741 | 0.2    | 0.828±0.037 | 0.694 | 0.28   |
|                     | 10         | 0.805±0.047 | 0.741 | 0.2    | 0.828±0.037 | 0.694 | 0.28   |
|                     | C          |             |       |        |             |       |        |
| SVC                 | 1          | 0.820±0.018 | 0.564 | 0.069  | 0.850±0.044 | 0.768 | 0.07   |
|                     | 0.5        | 0.820±0.018 | 0.771 | 0.073  | 0.851±0.043 | 0.777 | 0.069  |
|                     | Criterion  |             |       |        |             |       |        |
| Decision Tree       | Gini       | 0.750±0.051 | 0.784 | 1      | 0.761±0.075 | 0.766 | 1      |
|                     | Log Loss   | 0.725±0.038 | 0.768 | 1      | 0.737±0.048 | 0.748 | 1      |
| Logistic Regression |            | 0.830±0.037 | 0.820 | 0.082  | 0.803±0.063 | 0.768 | 0.104  |
|                     |            | 60 Day      |       |        | 90 Day      |       |        |
|                     | Trees      |             |       |        |             |       |        |
| Random Forest       | 10         | 0.918±0.022 | 0.789 | 0.212  | 0.898±0.025 | 0.882 | 0.216  |
|                     | 25         | 0.915±0.028 | 0.825 | 0.164  | 0.898±0.022 | 0.896 | 0.218  |
|                     | 100        | 0.913±0.026 | 0.792 | 0.212  | 0.894±0.026 | 0.891 | 0.186  |
|                     | Trees      |             |       |        |             |       |        |
| Gradient Boosting   | 10         | 0.898±0.028 | 0.792 | 0.140  | 0.872±0.036 | 0.856 | 0.051  |
|                     | 25         | 0.898±0.028 | 0.758 | 0.141  | 0.860±0.038 | 0.868 | 0.062  |
|                     | 100        | 0.897±0.030 | 0.769 | 0.132  | 0.865±0.034 | 0.887 | 0.102  |
|                     | Neighbors  |             |       |        |             |       |        |
| KNN                 | 5          | 0.897±0.02  | 0.725 | 0.2    | 0.814±0.042 | 0.810 | 0.2    |
|                     | 10         | 0.897±0.02  | 0.725 | 0.2    | 0.814±0.042 | 0.810 | 0.2    |
|                     | C          |             |       |        |             |       |        |
| SVC                 | 1          | 0.894±0.021 | 0.716 | 0.069  | 0.861±0.051 | 0.898 | 0.081  |
|                     | 0.5        | 0.894±0.022 | 0.716 | 0.069  | 0.861±0.051 | 0.898 | 0.081  |
|                     | Criterion  |             |       |        |             |       |        |
| Decision Tree       | Gini       | 0.714±0.02  | 0.656 | 1      | 0.747±0.062 | 0.715 | 1      |
|                     | Log Loss   | 0.701±0.016 | 0.633 | 1      | 0.739±0.053 | 0.699 | 1      |
| Logistic Regression |            | 0.849±0.043 | 0.694 | 0.14   | 0.771±0.063 | 0.891 | 0.092  |

**Supplementary Table S1.** Balanced accuracy with selected hyperparameters on system A. Balanced accuracy represents the average recall, weighted between positive and negative samples. Columns *CV* and *Test* correspond to balanced accuracy scores in cross-validation and on the test set, respectively, while *Thresh* gives the optimal threshold for that model as determined via the metric computation process. Higher thresholds imply better model discrimination between positive and negative predictions.

|                     |             | PRRS          |       |         | PEDV         |       |         |
|---------------------|-------------|---------------|-------|---------|--------------|-------|---------|
|                     |             | CV            | Test  | Thresh. | CV           | Test  | Thresh. |
|                     |             | Hidden Layers |       |         |              |       |         |
| MLP                 | (4, 2, 4)   | 0.637 ± 0.05  | 0.575 | 0.321   | 0.651 ± 0.14 | 0.537 | 0.688   |
|                     | (32, 4, 32) | 0.640 ± 0.06  | 0.523 | 0.256   | 0.765 ± 0.09 | 0.525 | 0.251   |
|                     | (32, 32)    | 0.626 ± 0.06  | 0.487 | 0.183   | 0.760 ± 0.13 | 0.527 | 0.460   |
|                     |             | Trees         |       |         |              |       |         |
| Random Forest       | 5           | 0.604 ± 0.06  | 0.618 | 0.480   | 0.697 ± 0.10 | 0.503 | 0.394   |
|                     | 10          | 0.619 ± 0.06  | 0.615 | 0.462   | 0.720 ± 0.11 | 0.511 | 0.354   |
|                     | 25          | 0.629 ± 0.05  | 0.564 | 0.468   | 0.723 ± 0.12 | 0.553 | 0.276   |
|                     |             | Trees         |       |         |              |       |         |
| Gradient Boosting   | 5           | 0.635 ± 0.07  | 0.568 | 0.357   | 0.719 ± 0.09 | 0.567 | 0.144   |
|                     | 10          | 0.607 ± 0.06  | 0.614 | 0.430   | 0.679 ± 0.07 | 0.499 | 0.220   |
|                     | 25          | 0.632 ± 0.07  | 0.553 | 0.353   | 0.723 ± 0.10 | 0.554 | 0.164   |
|                     |             | Neighbors     |       |         |              |       |         |
| KNN                 | 5           | 0.570 ± 0.05  | 0.484 | 0.680   | 0.648 ± 0.10 | 0.515 | 0.800   |
|                     | 10          | 0.571 ± 0.05  | 0.475 | 0.560   | 0.646 ± 0.10 | 0.509 | 0.800   |
|                     |             | C             |       |         |              |       |         |
| SVC                 | 0.5         | 0.614 ± 0.08  | 0.603 | 0.336   | 0.726 ± 0.08 | 0.528 | 0.306   |
|                     | 1           | 0.614 ± 0.08  | 0.607 | 0.343   | 0.726 ± 0.08 | 0.528 | 0.304   |
|                     |             | Criterion     |       |         |              |       |         |
| Decision Tree       | Gini        | 0.540 ± 0.02  | 0.528 | 1.00    | 0.586 ± 0.06 | 0.500 | 1.00    |
|                     | Log Loss    | 0.558 ± 0.02  | 0.566 | 1.00    | 0.632 ± 0.13 | 0.500 | 1.00    |
| Logistic Regression |             | 0.649 ± 0.06  | 0.507 | 0.294   | 0.715 ± 0.1  | 0.548 | 0.344   |

**Supplementary Table S2.** Balanced accuracy with selected hyperparameters on for PRRS and PEDV on system B. Columns *CV* and *Test* correspond to balanced accuracy scores in cross-validation and on the test set, respectively, while *Thresh* gives the optimal threshold for that model as determined via the metric-computation process.



|                     |             | IAV           |       |         | MHP          |       |         |
|---------------------|-------------|---------------|-------|---------|--------------|-------|---------|
|                     |             | CV            | Test  | Thresh. | CV           | Test  | Thresh. |
|                     |             | Hidden Layers |       |         |              |       |         |
| MLP                 | (4, 2, 4)   | 0.670 ± 0.04  | 0.637 | 0.430   | 0.723 ± 0.13 | 0.579 | 0.502   |
|                     | (32, 4, 32) | 0.661 ± 0.08  | 0.710 | 0.336   | 0.706 ± 0.16 | 0.641 | 0.343   |
|                     | (32, 32)    | 0.654 ± 0.09  | 0.623 | 0.292   | 0.716 ± 0.16 | 0.633 | 0.445   |
|                     |             | Trees         |       |         |              |       |         |
| Random Forest       | 5           | 0.669 ± 0.04  | 0.540 | 0.424   | 0.836 ± 0.07 | 0.589 | 0.282   |
|                     | 10          | 0.683 ± 0.05  | 0.560 | 0.462   | 0.82 ± 0.10  | 0.604 | 0.254   |
|                     | 25          | 0.679 ± 0.03  | 0.550 | 0.422   | 0.822 ± 0.08 | 0.637 | 0.302   |
|                     |             | Trees         |       |         |              |       |         |
| Gradient Boosting   | 5           | 0.678 ± 0.05  | 0.586 | 0.298   | 0.818 ± 0.09 | 0.571 | 0.402   |
|                     | 10          | 0.663 ± 0.05  | 0.651 | 0.206   | 0.831 ± 0.05 | 0.56  | 0.403   |
|                     | 25          | 0.668 ± 0.05  | 0.568 | 0.312   | 0.815 ± 0.08 | 0.663 | 0.396   |
|                     |             | Neighbors     |       |         |              |       |         |
| KNN                 | 5           | 0.607 ± 0.10  | 0.655 | 0.480   | 0.740 ± 0.09 | 0.492 | 0.240   |
|                     | 10          | 0.600 ± 0.07  | 0.590 | 0.560   | 0.758 ± 0.08 | 0.545 | 0.240   |
|                     |             | C             |       |         |              |       |         |
| SVC                 | 0.5         | 0.664 ± 0.06  | 0.613 | 0.351   | 0.748 ± 0.18 | 0.489 | 0.319   |
|                     | 1           | 0.664 ± 0.06  | 0.608 | 0.341   | 0.822 ± 0.14 | 0.554 | 0.155   |
|                     |             | Criterion     |       |         |              |       |         |
| Decision Tree       | Gini        | 0.575 ± 0.07  | 0.500 | 1.00    | 0.774 ± 0.14 | 0.529 | 1.00    |
|                     | Log Loss    | 0.556 ± 0.06  | 0.500 | 1.00    | 0.752 ± 0.11 | 0.546 | 1.00    |
| Logistic Regression |             | 0.713 ± 0.05  | 0.641 | 0.338   | 0.824 ± 0.06 | 0.718 | 0.35    |

**Supplementary Table S3.** Balanced accuracy with selected hyperparameters for IAV and MHP on system B. Columns *CV* and *Test* correspond to balanced accuracy scores in cross-validation and on the test set, respectively, while *Thresh* gives the optimal threshold for that model as determined via the metric-computation process.

|                   | PCA Components | 14 Day             |       |         | 30 Day             |       |         |
|-------------------|----------------|--------------------|-------|---------|--------------------|-------|---------|
|                   |                | CV                 | Test  | Thresh. | CV                 | Test  | Thresh. |
| Random Forest     | 20             | 0.861±0.034        | 0.864 | 0.242   | 0.866±0.029        | 0.815 | 0.188   |
|                   | 50             | 0.873±0.042        | 0.858 | 0.216   | 0.864±0.041        | 0.768 | 0.194   |
|                   | All            | 0.863±0.043        | 0.849 | 0.284   | 0.864±0.025        | 0.81  | 0.27    |
|                   | 10/10          | <b>0.885±0.047</b> | 0.842 | 0.204   | <b>0.880±0.03</b>  | 0.824 | 0.194   |
|                   | 20/20          | <b>0.885±0.036</b> | 0.835 | 0.188   | 0.877±0.038        | 0.846 | 0.156   |
| Gradient Boosting | 20             | 0.849±0.037        | 0.855 | 0.093   | 0.851±0.032        | 0.817 | 0.02    |
|                   | 50             | 0.873±0.032        | 0.867 | 0.069   | 0.857±0.022        | 0.808 | 0.05    |
|                   | All            | 0.865±0.049        | 0.885 | 0.046   | 0.863±0.034        | 0.819 | 0.146   |
|                   | 10/10          | 0.884±0.015        | 0.838 | 0.067   | <b>0.891±0.024</b> | 0.801 | 0.051   |
|                   | 20/20          | <b>0.889±0.038</b> | 0.851 | 0.056   | 0.881±0.022        | 0.81  | 0.044   |
| Random Forest     | 20             | 0.907±0.02         | 0.763 | 0.226   | 0.871±0.044        | 0.889 | 0.166   |
|                   | 50             | 0.898±0.03         | 0.747 | 0.29    | 0.876±0.049        | 0.873 | 0.144   |
|                   | All            | 0.899±0.04         | 0.743 | 0.364   | 0.892±0.034        | 0.866 | 0.276   |
|                   | 10/10          | <b>0.927±0.027</b> | 0.798 | 0.236   | 0.889±0.032        | 0.882 | 0.178   |
|                   | 20/20          | 0.910±0.029        | 0.783 | 0.272   | <b>0.901±0.023</b> | 0.868 | 0.146   |
| Gradient Boosting | 20             | 0.900±0.032        | 0.756 | 0.088   | 0.852±0.035        | 0.91  | 0.119   |
|                   | 50             | 0.877±0.031        | 0.749 | 0.056   | 0.853±0.027        | 0.887 | 0.068   |
|                   | All            | <b>0.904±0.027</b> | 0.751 | 0.15    | 0.883±0.017        | 0.868 | 0.157   |
|                   | 10/10          | 0.901±0.033        | 0.785 | 0.121   | 0.865±0.037        | 0.898 | 0.047   |
|                   | 20/20          | 0.898±0.034        | 0.816 | 0.056   | <b>0.869±0.032</b> | 0.875 | 0.054   |

**Supplementary Table S4.** Effects of changing the number of components of the features set in system A. Components labeled as pairs are components of close out and sow features, respectively, while single values are components across the entire feature set.

|       | System B |       |       | System A |       |
|-------|----------|-------|-------|----------|-------|
|       | PRRS     | PEDV  | MHP   | IAV      |       |
| Train | 0.271    | 0.135 | 0.226 | 0.367    | 0.114 |
| Test  | 0.067    | 0.160 | 0.453 | 0.491    | 0.113 |

**Supplementary Table S5.** Percentage of positive samples in the training and test sets.

|       | System B |       |       | System A |       |
|-------|----------|-------|-------|----------|-------|
|       | PRRS     | PEDV  | MHP   | IAV      |       |
| Train | 0.755    | 0.191 | 0.121 | 0.314    | 0.240 |
| Test  | 0.764    | 0.080 | 0.035 | 0.678    | 0.250 |

**Supplementary Table S6.** Percentage of sow farms in the training and test sets.

|  | System B |       |       | System A |       |
|--|----------|-------|-------|----------|-------|
|  | PRRS     | PEDV  | MHP   | IAV      |       |
|  | 0.877    | 0.723 | 0.821 | 0.751    | 0.000 |

**Supplementary Table S7.** Percentage of samples in the training set that do not have movement data in system B.

| Window        | $n = 14$ | $n = 30$ | $n = 60$ | $n = 90$ |
|---------------|----------|----------|----------|----------|
| Features      | 204      | 213      | 219      | 220      |
| + samples     | 113      | 113      | 113      | 109      |
| - samples     | 901      | 894      | 878      | 862      |
| Total samples | 1014     | 1007     | 991      | 972      |

**Supplementary Table S8.** Number of features and samples by window length in system A (all diseases). + samples and – samples denote positive and negative samples as defined by diagnoses on a given day, respectively.

|               | PRRS | PEDV | IAV | MHP |
|---------------|------|------|-----|-----|
| Features      | 273  | 405  | 273 | 259 |
| + Samples     | 708  | 475  | 271 | 97  |
| - Samples     | 2507 | 2891 | 410 | 246 |
| Total Samples | 3215 | 3366 | 681 | 343 |

**Supplementary Table S9.** Number of features and samples by disease in system B. + samples and – samples denote positive and negative samples as defined by diagnoses on a given day, respectively.

| Model stage         | Hyperparameters                                        |
|---------------------|--------------------------------------------------------|
| Dimension reduction | Stratified or unstratified<br>Component number         |
| Feature selection   | Number of features                                     |
| Classification      | Choice of classifier<br>Model-specific hyperparameters |
| Evaluation          | Threshold values                                       |

**Supplementary Table S10.** Hyperparameters by model stage.

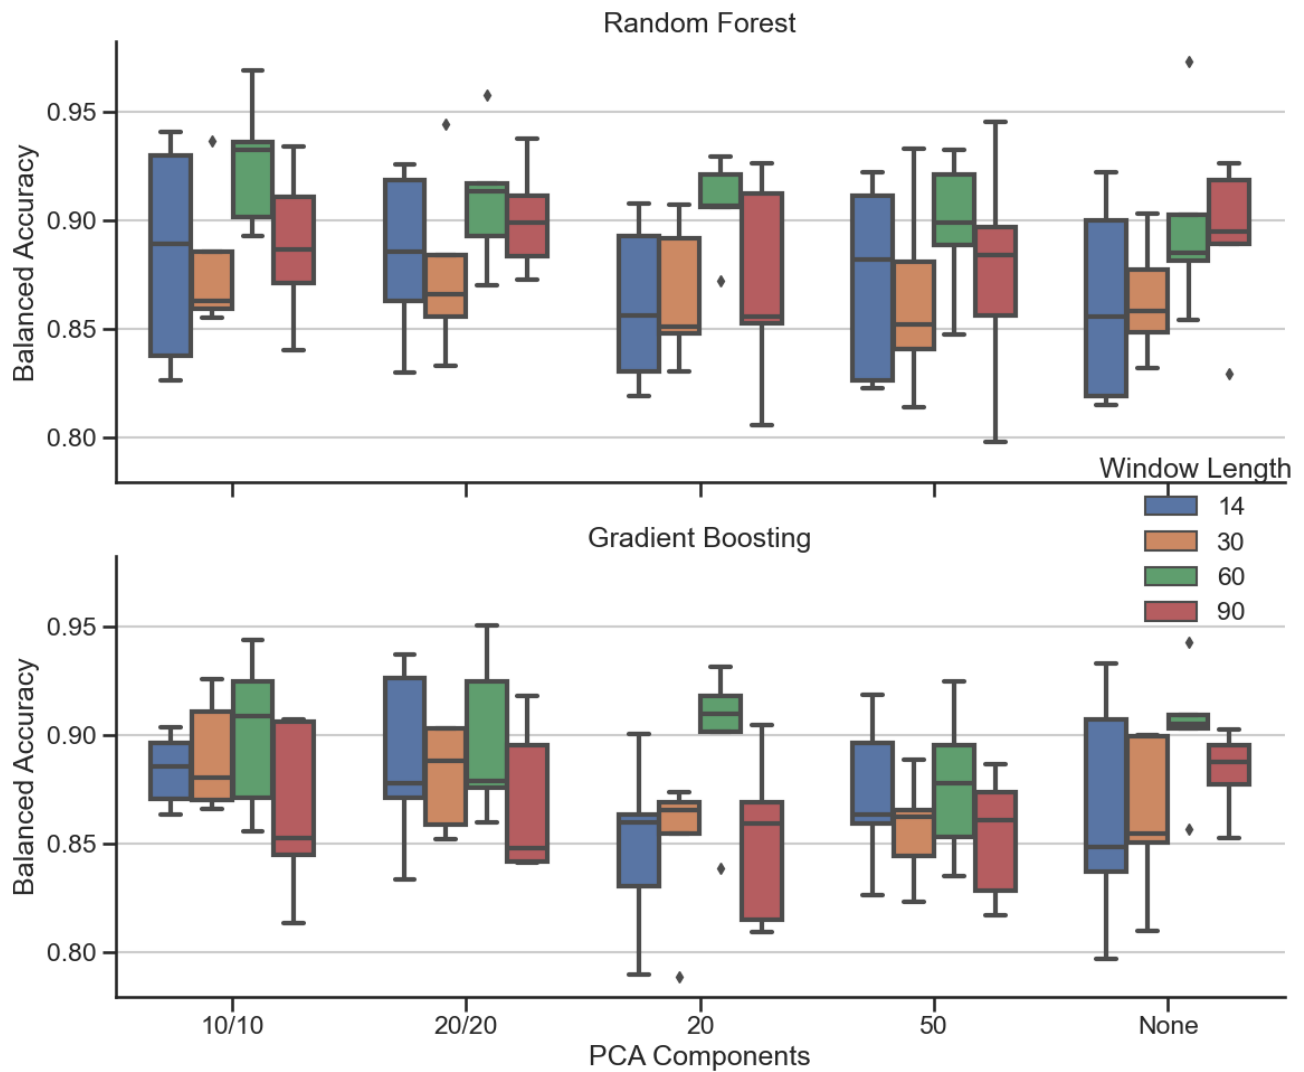

**Supplementary Figure S1.** Effects of changing the number of components of the features set across cross-validation splits on system A; points represent the scores on each split for random forest and gradient boosting models on the top and bottom, respectively.. Components labeled as pairs are components of close out and sow features, respectively, while single values are components across the entire feature set. None refers to no PCA, or usage of all features.

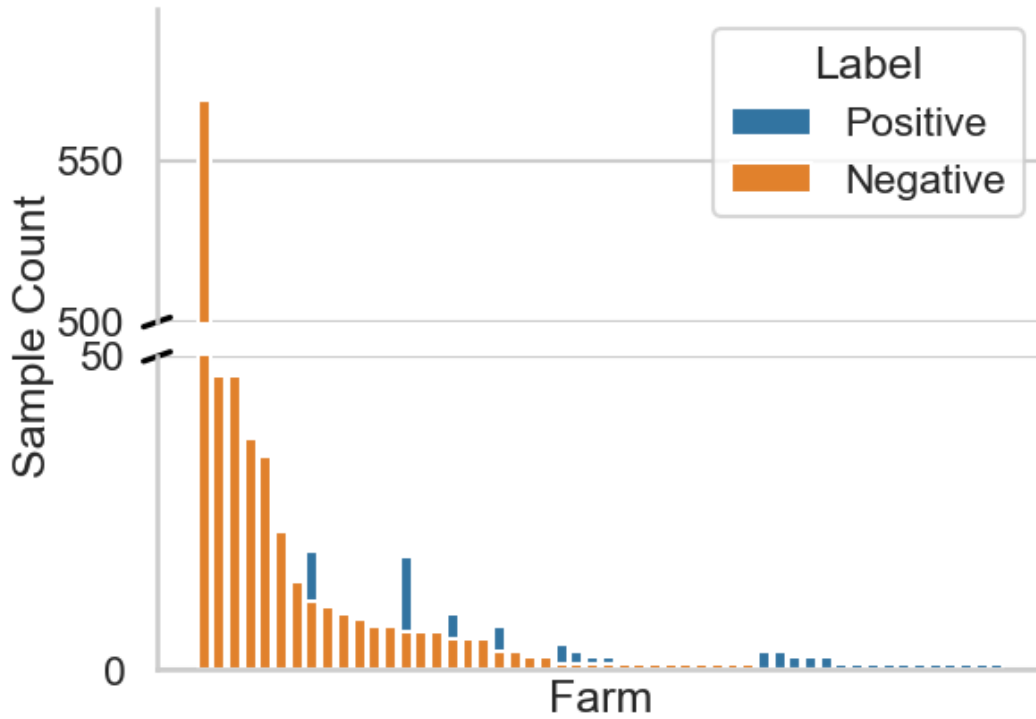

**Supplementary Figure S2.** Distribution of samples by farm in system A. Each bar represents a single farm.

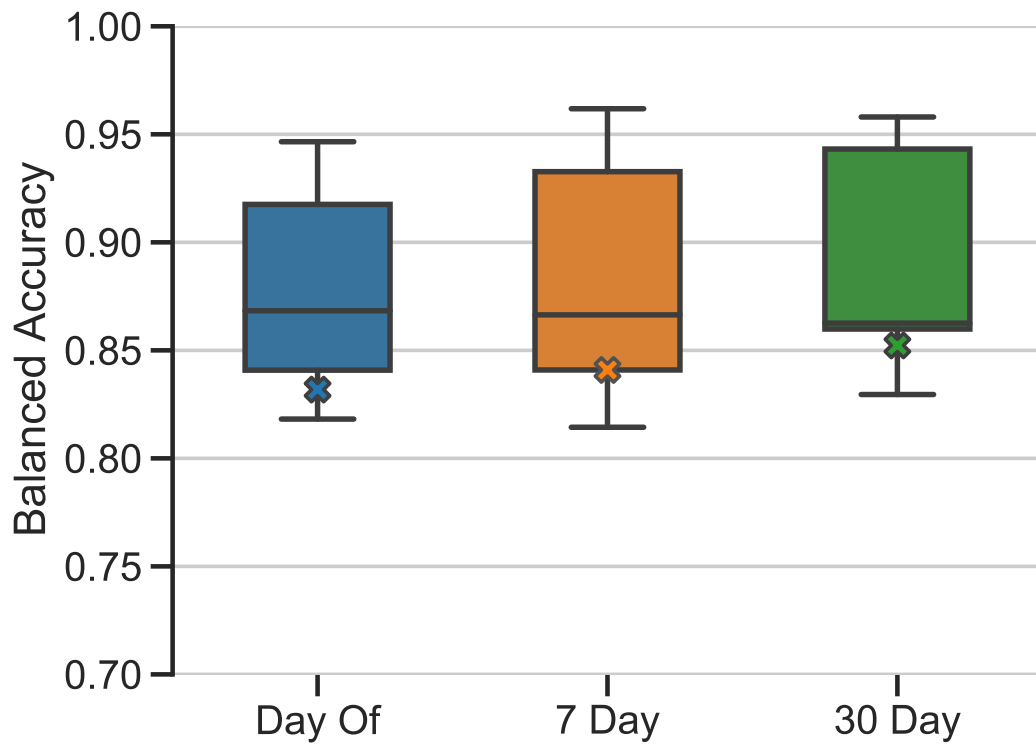

**Supplementary Figure S3.** Comparison of day-of prediction with lagged predictions on system A. X markers denote test set scores.

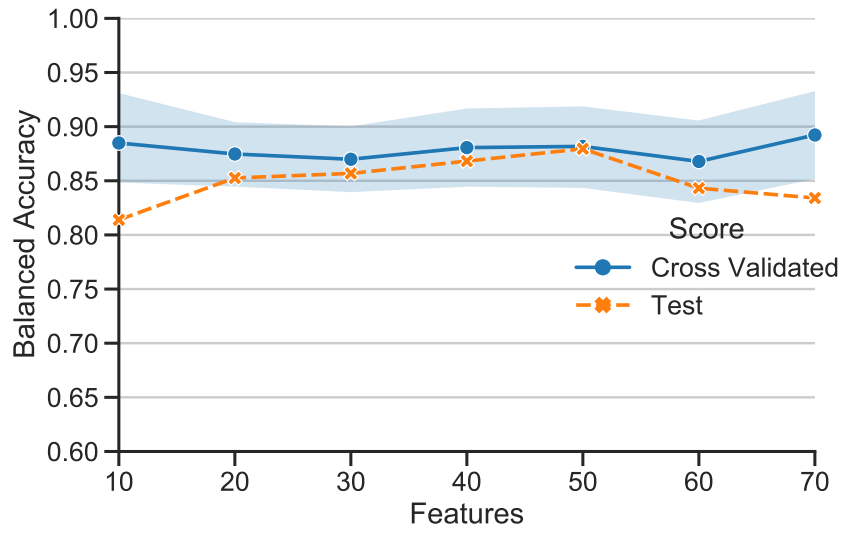

(a) System A

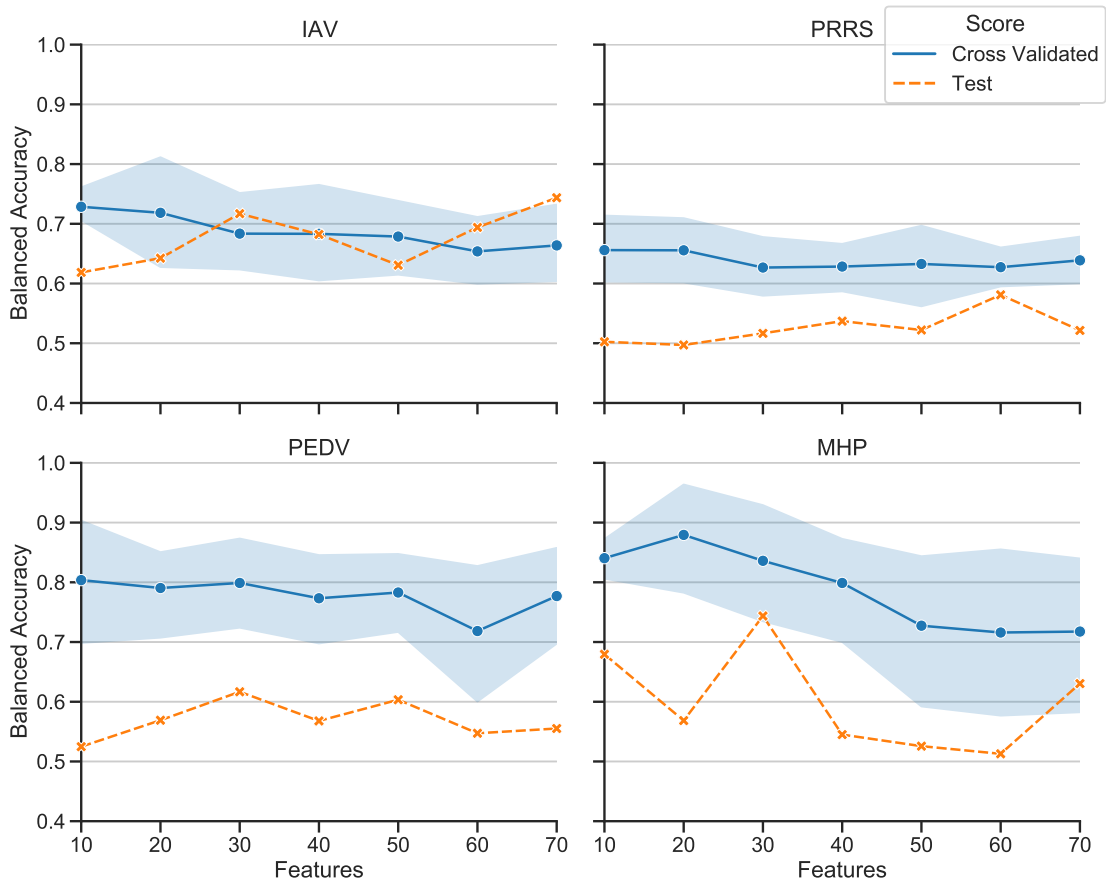

(b) System B

**Supplementary Figure S4.** Model performance with feature selection by permutation feature importance using all features, in increments of ten features.
